# Supplementary material for: Improved photocatalytic activity by utilizing the internal electric field of polar semiconductors: a case study of self-assembled NaNbO3oriented nanostructures
Source: Royal Society of Chemistry journal article supplement (doi:10.1039/c3ra45954c), 2013-10-30
Supplement: c3ra45954c.pdf [file c3ra45954c.pdf]

## Supporting Information for

### Improve Photocatalytic Activity by Utilizing Internal Electric Field of Polar Semiconductors:

#### A Case Study of Self-Assembled $\text{NaNbO}_3$ Oriented Nanostructures

Linqin Jiang,<sup>a</sup> Yaohong Zhang,<sup>a</sup> Yu Qiu<sup>b</sup> and Zhiguo Yi<sup>\*a</sup>

---

<sup>a</sup>Key Laboratory of Optoelectronic Materials Chemistry and Physics, Fujian Institute of Research on the Structure of Matter, Chinese Academy of Sciences, Fuzhou 350002 (China). \*E-mail: zhiguo@fjirsm.ac.cn

<sup>b</sup>New Energy Technology Center, Shanghai Institute of Microsystem and Information Technology, Chinese Academy of Sciences, Shanghai 201807 (China)

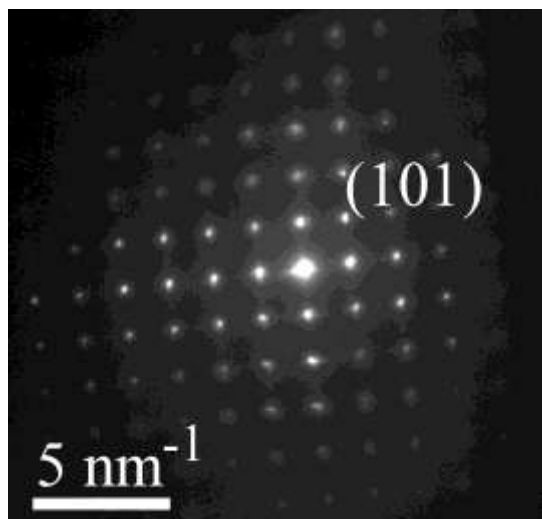

**Fig. S1** ED pattern of a NaNbO<sub>3</sub> nanocuboid (NNB-1 sample).

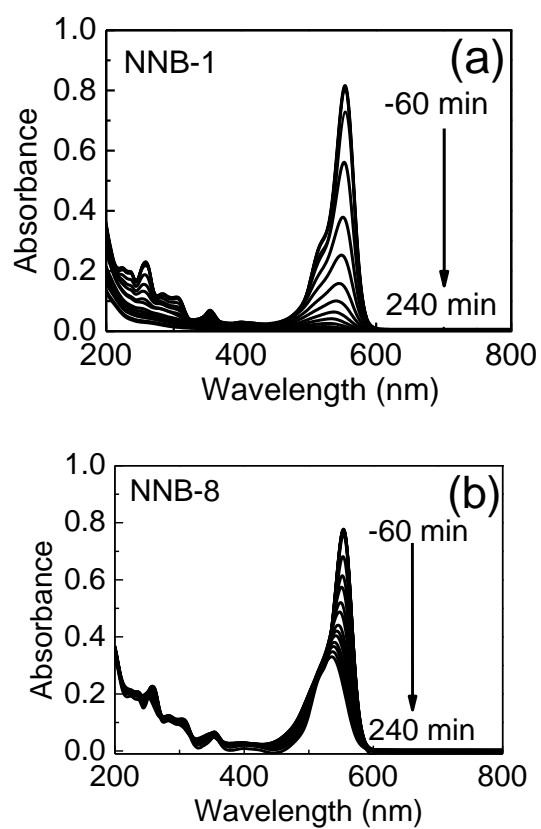

**Fig. S2** UV-vis spectral changes of RhB as a function of irradiation time catalyzed by (a) the ordered NNB-1 and (b) the disordered NNB-8 samples.

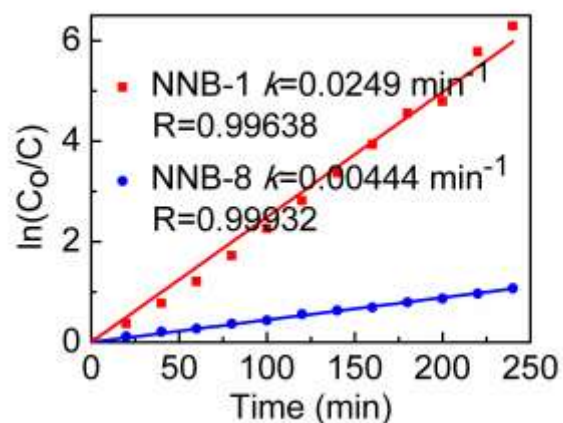

**Fig. S3** Kinetics of RhB photodegradation upon the NNB-1 and NNB-8 samples respectively

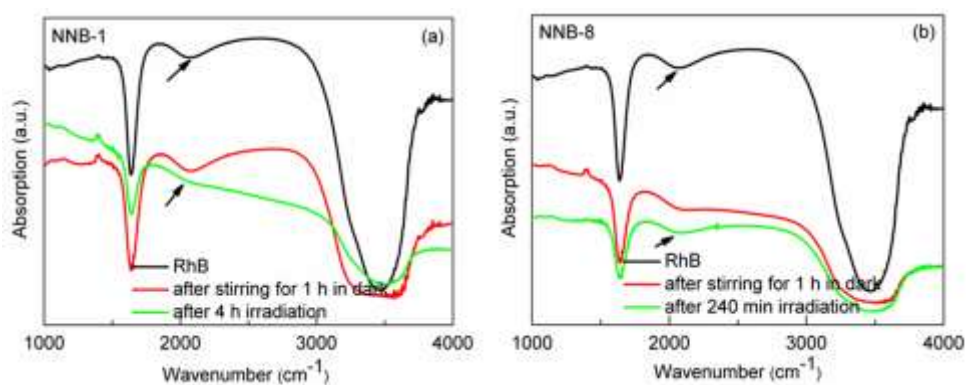

**Fig. S4** (a) FTIR spectra of RhB reference solution (black line), the supernatant of the mixed solution of RhB and NNB-1 after 1 h stirring in the dark (red line), and the supernatant after 4 h irradiation (Olivine line); (b) FTIR spectra of blank RhB (black line), the supernatant of the mixed solution of RhB and NNB-8 after stirring for 1 h in the dark (red line), and the supernatant after 4 h irradiation (Olivine line).

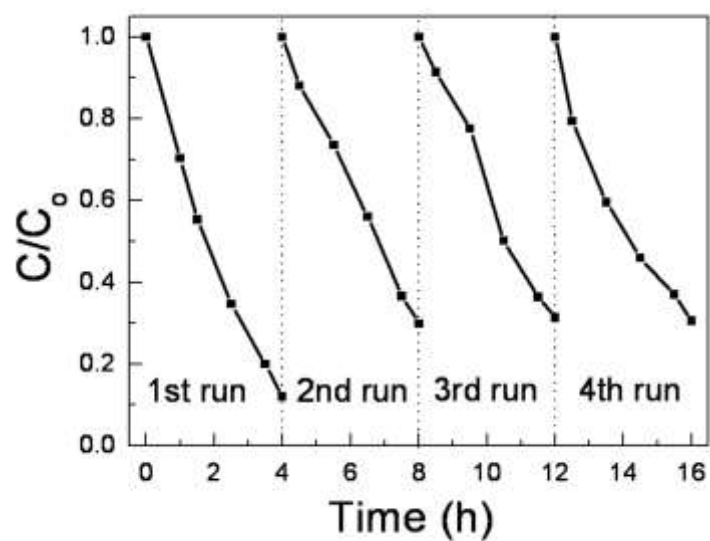

**Fig. S5** Recycling test for the photocatalytic degradation of RhB on the ordered NNB-1 under sunlight.

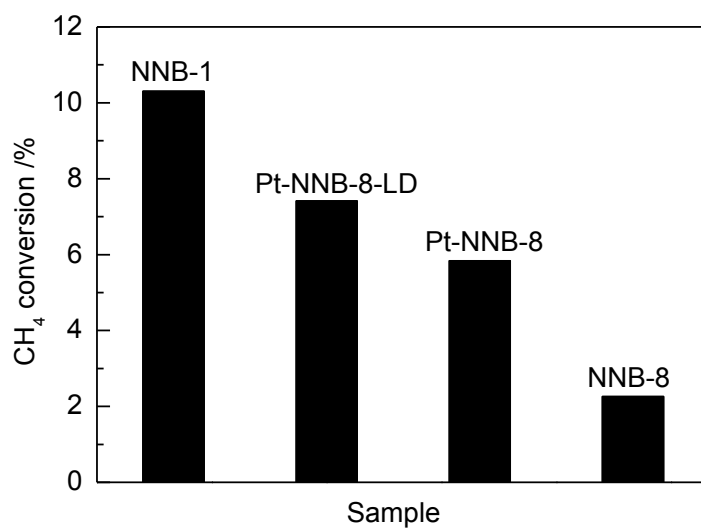

**Fig. S6**  $CH_4$  conversion efficiency upon different samples after seven hours illumination of simulated sunlight.

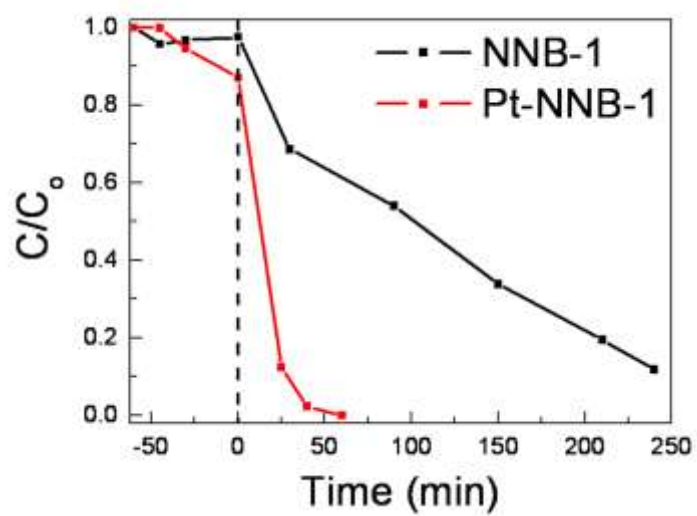

**Fig. S7.** Photodegradation of RhB upon the ordered NNB-1 and Pt-NNB-1 samples under sunlight

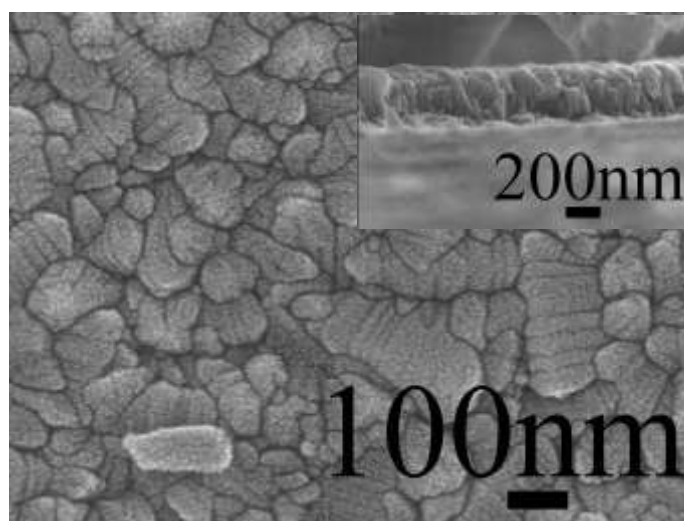

**Fig. S8** SEM images of the thin film prepared by ordered NNB-1.

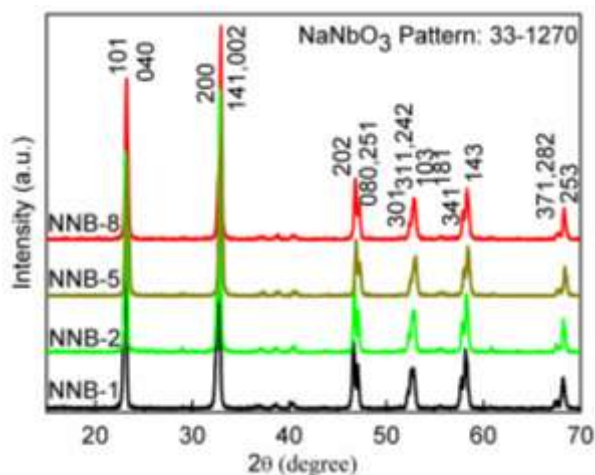

**Fig. S9** XRD patterns of the  $\text{NaNbO}_3$  samples obtained after dwelling at  $200\text{ }^\circ\text{C}$  for 24 h under various NaOH concentration.

**Table S1** Fabrication conditions as well as some basic physical parameters of the  $\text{NaNbO}_3$  samples in Figure S6.

| Sample | Synthesis conditions                             | Lattice parameters                   | Band gap (eV) |
|--------|--------------------------------------------------|--------------------------------------|---------------|
| NNB-1  | [NaOH]=1 M, $200\text{ }^\circ\text{C}$ , 24 h   | a=5.473 Å<br>b=15.553 Å<br>c=5.537 Å | 3.26          |
| NNB-2  | [NaOH]=2.5 M, $200\text{ }^\circ\text{C}$ , 24 h | a=5.563 Å<br>b=15.536 Å<br>c=5.511 Å | 3.26          |
| NNB-5  | [NaOH]=5 M, $200\text{ }^\circ\text{C}$ , 24 h   | a=5.683 Å<br>b=15.493 Å<br>c=5.489 Å | 3.26          |
| NNB-8  | [NaOH]=8 M, $200\text{ }^\circ\text{C}$ , 24 h   | a=5.535 Å<br>b=15.527 Å<br>c=5.508 Å | 3.26          |

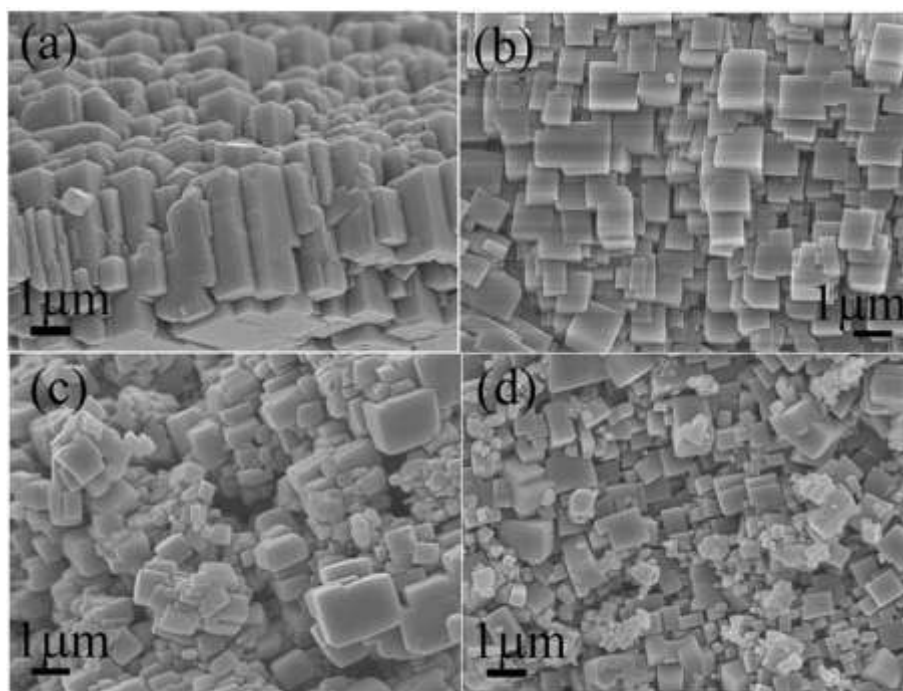

**Fig. S10** SEM images of the NaNbO<sub>3</sub> samples obtained after dwelling at 200 °C for 24 h with different NaOH concentration: (a) NNB-1 ([NaOH] = 1 M) , (b) NNB-2 ([NaOH] = 2.5 M), (c) NNB-5 ([NaOH] = 5 M) and NNB-8 ([NaOH] = 8 M).

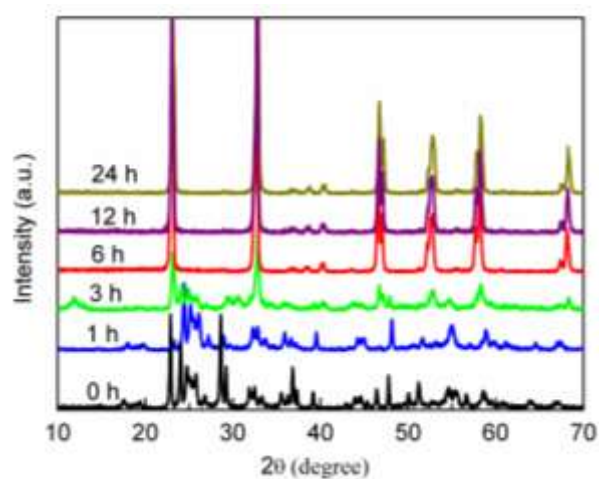

**Fig. S11** XRD patterns of the as-prepared samples obtained after dwelling at 200 °C for different time with [NaOH]=1 M.

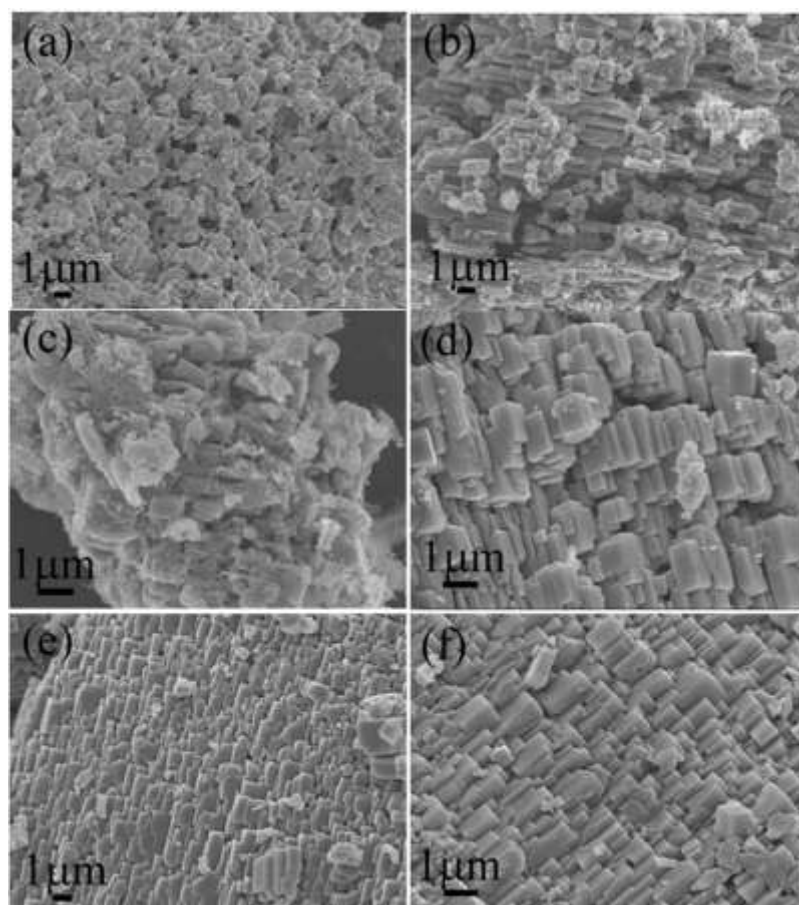

**Fig. S12** SEM images of the samples prepared at 200 °C and [NaOH]=1 M for various dwelling time: (a) 0 h, (b) 1 h, (c) 3 h, (d) 6 h, (e) 12 h and (f) 24 h.
